# Supplementary material for: Modulation of the peripheral blood transcriptome by the ingestion of probiotic yoghurt and acidified milk in healthy, young men
Source: PubMed Central journal article supplement (PMC5831037; doi:10.1371/journal.pone.0192947), 2018-02-28

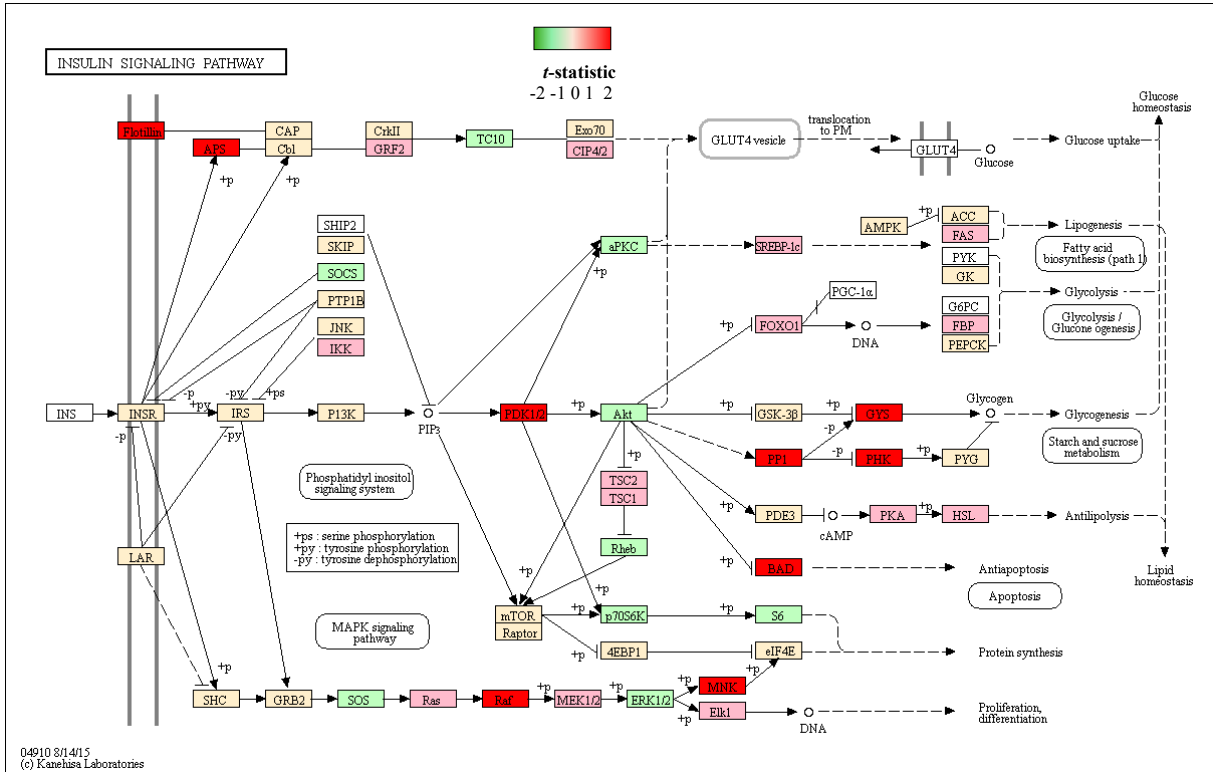

Supplement: pone.0192947.s005.pdf [file pone.0192947.s005.pdf]
