# Supplementary material for: Modulation of the peripheral blood transcriptome by the ingestion of probiotic yoghurt and acidified milk in healthy, young men
Source: PubMed Central journal article supplement (PMC5831037; doi:10.1371/journal.pone.0192947), 2018-02-28
Supplement: pone.0192947.s006.pdf [file pone.0192947.s006.pdf]

| Question                                       | Assessment                   | Low response (0)        | High response (100) |
|------------------------------------------------|------------------------------|-------------------------|---------------------|
| Q1. How hungry are you?                        | Hunger                       | Not hungry at all       | Extremely hungry    |
| Q2. How satiated are you?                      | Satiety                      | Not at all satiated     | Extremely satiated  |
| Q3. How much food do you feel able to eat?     | Prospective food consumption | An insignificant amount | A huge amount       |
| Q4. How much do you want to eat savoury foods? | Appetite for savoury foods   | Not at all              | A lot               |
| Q5. How much do you want to eat sweet food?    | Appetite for sweet foods     | Not at all              | A lot               |
| Q6. How relaxed are you?                       | State of ease                | Not at all relaxed      | Extremely relaxed   |
