# Supplementary material for: Modulation of the peripheral blood transcriptome by the ingestion of probiotic yoghurt and acidified milk in healthy, young men
Source: PubMed Central journal article supplement (PMC5831037; doi:10.1371/journal.pone.0192947), 2018-02-28
Supplement: pone.0192947.s007.pdf [file pone.0192947.s007.pdf]

| <b>Immune</b>                             | <b>Cellular metabolism</b> | <b>Development</b>                | <b>Cellular signalling</b> | <b>Heme metabolism</b> | <b>Other Pathways</b> |
|-------------------------------------------|----------------------------|-----------------------------------|----------------------------|------------------------|-----------------------|
| Inflammatory response                     | MTORC1 signalling          | Angiogenesis                      | Oestrogen response (early) | Heme metabolism        | Xenobiotic Metabolism |
| Interferon gamma response                 | Glycolysis                 | Epithelial mesenchymal transition | IL2 STAT5 signalling       |                        | Apoptosis             |
| TNF $\alpha$ signalling via NF $\kappa$ B | Hypoxia                    |                                   |                            |                        | UV response (down)    |
| Allograft rejection                       |                            |                                   |                            |                        |                       |
| Interferon alpha response                 |                            |                                   |                            |                        |                       |
| IL6 JAK STAT3 signalling                  |                            |                                   |                            |                        |                       |
