# Supplementary material for: Modulation of the peripheral blood transcriptome by the ingestion of probiotic yoghurt and acidified milk in healthy, young men
Source: PubMed Central journal article supplement (PMC5831037; doi:10.1371/journal.pone.0192947), 2018-02-28
Supplement: pone.0192947.s008.pdf [file pone.0192947.s008.pdf]

| Parameter                  | Group acidified milk – probiotic yoghurt |                              |                                     |          | Group probiotic yoghurt - acidified milk |                                     | Statistical Assessments        |                              |
|----------------------------|------------------------------------------|------------------------------|-------------------------------------|----------|------------------------------------------|-------------------------------------|--------------------------------|------------------------------|
|                            | <i>n</i>                                 | Median iAUC milk (IQR)       | Median iAUC probiotic yoghurt (IQR) | <i>n</i> | Median iAUC milk (IQR)                   | Median iAUC probiotic yoghurt (IQR) | Carry over effect Sum <i>P</i> | Intervention effect <i>P</i> |
| Glycemia (mmol/l)          | 6                                        | 0.8(-17.8- 16.5)             | 5.6(-9.9-24.6)                      | 7        | -21.0(-28.5- -6)                         | -25.5(-35.3- 6)                     | 0.174                          | 0.431                        |
| Insulin (mU/l)             | 6                                        | 1079.6(897.9- 1275.4)        | 1552.5(1504.7-1906.3)               | 7        | 1004.3(876.4- 1435.9)                    | 1839.8(1363.9- 2170.1)              | 0.945                          | <b>0.001*</b>                |
| Total cholesterol (mmol/l) | 6                                        | 69.0(27.4- 101.6)            | 25.5(-12.4-64.5)                    | 7        | 70.5(60.0- 87.0)                         | 70.5(60- 111.8)                     | 0.138                          | 0.295                        |
| HDL cholesterol (mmol/l)   | 6                                        | 9.7(0.4- 18)                 | -8.3(-16.5-1.1)                     | 7        | 18.0(9.7- 18.0)                          | 18.0(0.0- 26.3)                     | 0.097                          | 0.612                        |
| LDL cholesterol (mmol/l)   | 6                                        | 60.0(39.8- 70.1)             | 25.5(-21.8-59.3)                    | 7        | 51.0(24.8- 86.2)                         | 67.5(35.3- 120.0)                   | 0.223                          | 0.534                        |
| TAG (mmol/l)               | 6                                        | 57.0(41.6- 85.9)             | 96.0(79.9-102.0)                    | 7        | 43.5(34.5- 96.8)                         | 82.5(57.8- 107.3)                   | 0.945                          | 0.295                        |
| LPS(EU/ml)                 | 6                                        | 237.9(117.8- 348.2)          | 64.8(8.1-107.1)                     | 7        | 157.8(103.8- 188.7)                      | 212.4(93.3- 341.7)                  | 0.445                          | 0.534                        |
| CCL2 (pg/ml)               | 6                                        | -44.0(-654.6- 103.9)         | -239.9(-593.5-99.7)                 | 7        | -821.4(-1300.4- -427.6)                  | -651.0(-1154.1- -371.8)             | 0.051                          | 0.445                        |
| CCL5(pg/ml)                | 6                                        | 257152.5(237221.3- 327708.8) | 39397.5(21622.5-56880.0)            | 7        | 161640.0(78900.0- 341080.5)              | 109845.0(57525.0- 717172.5)         | 1.000                          | 0.234                        |
| IL6 (pg/ml)                | 6                                        | 6926.6(3507.5- 9516.5)       | 976.7(556.8-1492.5)                 | 7        | 4894.5(2236.1- 7192.4)                   | 1744.4(835.4- 16501.1)              | 0.628                          | 0.181                        |
| TNFα (pg/ml)               | 6                                        | 4318.2(3586.8- 7347.4)       | 826.4(544.0-1431.0)                 | 7        | 4306.4(992.9- 6467.8)                    | 1831.1(769.4- 12597.3)              | 0.836                          | 0.101                        |
