# Supplementary material for: Modulation of the peripheral blood transcriptome by the ingestion of probiotic yoghurt and acidified milk in healthy, young men
Source: PubMed Central journal article supplement (PMC5831037; doi:10.1371/journal.pone.0192947), 2018-02-28
Supplement: pone.0192947.s009.pdf [file pone.0192947.s009.pdf]

| Satiety Questions            | Group acidified milk - probiotic yoghurt |                                  |                                     | Group probiotic yoghurt - acidified milk |                                  |                                     | Statistical Assessments    |                              |
|------------------------------|------------------------------------------|----------------------------------|-------------------------------------|------------------------------------------|----------------------------------|-------------------------------------|----------------------------|------------------------------|
|                              | <i>n</i>                                 | Median iAUC acidified milk (IQR) | Median iAUC probiotic yoghurt (IQR) | <i>n</i>                                 | Median iAUC acidified milk (IQR) | Median iAUC probiotic yoghurt (IQR) | Carry-over effect <i>P</i> | Intervention effect <i>P</i> |
| Hunger                       | 6                                        | -12020(-21072- -4478)            | -12254(-15698- -3884)               | 5                                        | -2704(-3189- -2519)              | -341(-3937- 259)                    | 0.329                      | 0.247                        |
| Satiety                      | 6                                        | 9394(2484- 24404)                | 17480(6079- 19741)                  | 5                                        | 7530(-693- 8293)                 | 148(-1962- 5319)                    | 0.537                      | 0.177                        |
| Prospective food consumption | 6                                        | -5344(-13456- -1120)             | -12951(-16932- -3836)               | 5                                        | -5758(-7367- 31)                 | -2769(-4180- -1582)                 | 0.662                      | 0.931                        |
| Appetite for savoury foods   | 6                                        | 3181(-1794- 5111)                | 796(-5494- 4911)                    | 5                                        | 1116(284- 4724)                  | 3019(1869- 4451)                    | 0.931                      | 0.792                        |
| Appetite for sweet foods     | 6                                        | -11982(-18801- -2862)            | -13600(-17660- -13045)              | 5                                        | 2419(-5953- 4333)                | 2664(-754- 3589)                    | <b>0.009*</b>              | 0.537                        |
| State of ease                | 6                                        | 3365(231- 6331)                  | 6711(3078- 9372)                    | 5                                        | -88(-683- 2965)                  | 3626(157- 3889)                     | 0.247                      | 0.537                        |
