# Supplementary material for: Modulation of the peripheral blood transcriptome by the ingestion of probiotic yoghurt and acidified milk in healthy, young men
Source: PubMed Central journal article supplement (PMC5831037; doi:10.1371/journal.pone.0192947), 2018-02-28
Supplement: pone.0192947.s010.pdf [file pone.0192947.s010.pdf]

| Ensembl ID             | Gene Symbol  | Gene name                                            | Time of assessment (h) | <i>t</i> -statistic | <i>p</i> <sub>adj</sub> |
|------------------------|--------------|------------------------------------------------------|------------------------|---------------------|-------------------------|
| ENSG00000171451        | DSEL         | Dermatan sulfate epimerase-like                      | 2                      | -8.4                | 0.07                    |
| ENSG00000101460        | MAP1LC3A     | Microtubule associated protein 1 light chain 3 alpha | 2                      | 8.2                 | 0.07                    |
| <b>ENSG00000124882</b> | <b>EREG</b>  | <b>Epiregulin</b>                                    | <b>2</b>               | <b>-7.6</b>         | <b>0.10</b>             |
| ENSG00000181019        | NQO1         | NAD(P)H quinone dehydrogenase 1                      | 2                      | -7.1                | 0.10                    |
| ENSG00000185875        | THNSL1       | Threonine synthase like 1                            | 2                      | -7.0                | 0.10                    |
| <b>ENSG00000164023</b> | <b>SGMS2</b> | <b>Sphingomyelin synthase 2</b>                      | <b>4</b>               | <b>-13.0</b>        | <b>0.003</b>            |
| ENSG00000171451        | DSEL         | Dermatan sulfate epimerase-like                      | 4                      | -8.7                | 0.05                    |
| <b>ENSG00000106546</b> | <b>AHR</b>   | <b>Aryl hydrocarbon receptor</b>                     | <b>4</b>               | <b>-7.1</b>         | <b>0.10</b>             |
| ENSG00000126453        | BCL2L12      | BCL2 like 12                                         | 4                      | 7.0                 | 0.10                    |
| ENSG00000141384        | TAF4B        | TATA-box binding protein associated factor 4b        | 4                      | -7.0                | 0.10                    |
| <b>ENSG00000164023</b> | <b>SGMS2</b> | <b>Sphingomyelin synthase 2</b>                      | <b>6</b>               | <b>-10.0</b>        | <b>0.04</b>             |
| ENSG00000096060        | FKBP5        | FK506 binding protein 5                              | 6                      | -8.4                | 0.08                    |
| ENSG00000174776        | WDR49        | WD repeat domain 49                                  | 6                      | -7.9                | 0.09                    |
