# Supplementary material for: Modulation of the peripheral blood transcriptome by the ingestion of probiotic yoghurt and acidified milk in healthy, young men
Source: PubMed Central journal article supplement (PMC5831037; doi:10.1371/journal.pone.0192947), 2018-02-28
Supplement: pone.0192947.s011.pdf [file pone.0192947.s011.pdf]

| Postprandial responses at 2h      |       |       |                         |
|-----------------------------------|-------|-------|-------------------------|
| Geneset                           | ES    | NES   | <i>p</i> <sub>adj</sub> |
| <i>Acidified milk</i>             |       |       |                         |
| Inflammatory response             | 0.50  | 1.50  | 0.02*                   |
| Interferon gamma response         | 0.43  | 1.34  | 0.08*                   |
| TNF $\alpha$ signalling via NF-kB | 0.45  | 1.38  | 0.08*                   |
| Allograft rejection               | -0.43 | -1.40 | 0.08*                   |
| TNF $\alpha$ signalling via NF-kB | -0.42 | -1.36 | 0.17                    |
| <i>Probiotic yoghurt</i>          |       |       |                         |
| IL6 JAK STAT3 signalling          | 0.57  | 1.60  | 0.009*                  |
| TNF $\alpha$ signalling via NF-kB | 0.48  | 1.42  | 0.01*                   |
| Interferon gamma response         | 0.44  | 1.32  | 0.05*                   |
| Inflammatory response             | 0.45  | 1.31  | 0.17                    |
| Heme metabolism                   | -0.42 | -1.27 | 0.18                    |
| Reactive oxygen species pathway   | -0.63 | -1.54 | 0.18                    |
| P53 pathway                       | 0.43  | 1.27  | 0.18                    |
| Androgen response                 | -0.48 | -1.36 | 0.18                    |
| Interferon alpha response         | 0.44  | 1.28  | 0.18                    |
| Hedgehog signalling               | -0.64 | -1.53 | 0.18                    |

| Postprandial responses at 4h      |       |       |                         |
|-----------------------------------|-------|-------|-------------------------|
| Geneset                           | ES    | NES   | <i>p</i> <sub>adj</sub> |
| <i>Acidified milk</i>             |       |       |                         |
| Interferon gamma response         | 0.50  | 1.48  | 0.01*                   |
| Interferon alpha response         | 0.54  | 1.53  | 0.02*                   |
| Apoptosis                         | 0.51  | 1.47  | 0.03*                   |
| Glycolysis                        | -0.48 | -1.39 | 0.05*                   |
| MTORC1 signalling                 | -0.45 | -1.34 | 0.05*                   |
| Oestrogen response (early)        | -0.48 | -1.39 | 0.05*                   |
| Hypoxia                           | -0.46 | -1.35 | 0.10*                   |
| Angiogenesis                      | -0.65 | -1.58 | 0.10*                   |
| Inflammatory response             | -0.45 | -1.30 | 0.19                    |
| Myogenesis                        | 0.47  | 1.34  | 0.19                    |
| <i>Probiotic yoghurt</i>          |       |       |                         |
| Heme metabolism                   | -0.54 | -1.55 | 0.001*                  |
| Oestrogen response (late)         | -0.55 | -1.51 | 0.01*                   |
| IL6 JAK STAT3 signalling          | -0.65 | -1.66 | 0.01*                   |
| Angiogenesis                      | -0.82 | -1.79 | 0.01*                   |
| Inflammatory response             | -0.53 | -1.46 | 0.02*                   |
| TNF $\alpha$ signalling via NF-kB | 0.48  | 1.40  | 0.02*                   |
| Epithelial mesenchymal transition | -0.54 | -1.46 | 0.03*                   |
| UV response (down)                | -0.49 | -1.35 | 0.10*                   |
| TNF $\alpha$ signalling via NF-kB | -0.48 | -1.34 | 0.10*                   |
| P53 pathway                       | -0.46 | -1.28 | 0.16                    |
| Myogenesis                        | -0.49 | -1.33 | 0.16                    |
| Xenobiotic Metabolism             | -0.47 | -1.30 | 0.16                    |
| Oestrogen response (early)        | -0.47 | -1.29 | 0.16                    |
| Hypoxia                           | -0.46 | -1.29 | 0.16                    |
| Hedgehog signalling               | -0.65 | -1.49 | 0.16                    |
| Complement                        | -0.46 | -1.27 | 0.16                    |
| Bile acid metabolism              | 0.49  | 1.33  | 0.17                    |
| IL2 STAT5 signalling              | -0.44 | -1.24 | 0.17                    |
| IL2 STAT5 signalling              | 0.43  | 1.25  | 0.17                    |
| KRAS signalling (up)              | -0.45 | -1.25 | 0.18                    |

| Postprandial responses at 6h      |       |       |                         |
|-----------------------------------|-------|-------|-------------------------|
| Geneset                           | ES    | NES   | <i>p</i> <sub>adj</sub> |
| <i>Acidified milk</i>             |       |       |                         |
| Heme metabolism                   | -0.46 | -1.41 | 0.01*                   |
| <i>Probiotic yoghurt</i>          |       |       |                         |
| Epithelial mesenchymal transition | -0.56 | -1.57 | 0.03*                   |
| IL2 STAT5 signalling              | -0.48 | -1.42 | 0.04*                   |
| Inflammatory response             | -0.49 | -1.44 | 0.04*                   |
| Glycolysis                        | -0.48 | -1.41 | 0.04*                   |
| IL6 JAK STAT3 signalling          | -0.58 | -1.57 | 0.05*                   |
| Xenobiotic Metabolism             | -0.48 | -1.39 | 0.07*                   |
| Allograft rejection               | -0.45 | -1.33 | 0.13                    |
| Hypoxia                           | -0.47 | -1.36 | 0.13                    |
| Hedgehog signaling                | -0.66 | -1.58 | 0.13                    |
| Oestrogen response (early)        | -0.46 | -1.34 | 0.13                    |
| Oestrogen response (late)         | -0.47 | -1.34 | 0.13                    |
| KRAS signalling (up)              | -0.45 | -1.32 | 0.14                    |
| Angiogenesis                      | -0.65 | -1.52 | 0.16                    |
| Reactive oxygen species pathway   | -0.56 | -1.44 | 0.19                    |
